# Supplementary material for: Policy Makers’ Priorities for Addressing Youth Substance Use and Factors That Influence Priorities
Source: Atypon-hosted journal article supplement (doi:10.1176/appi.ps.202000919), 2021-08-13
Supplement: appi.ps.202000919.ds001.pdf [file appi.ps.202000919.ds001.pdf]

**Supplemental Table 1. Means, Public Substance Use Agency Officials' Priorities for Youth Substance Use, State and County Officials, 2019-2020**

|                                                                                                | All<br>N= 122 |      |      | State<br>n= 42 |      |      | County<br>n= 80 |      |      | t     | p      |
|------------------------------------------------------------------------------------------------|---------------|------|------|----------------|------|------|-----------------|------|------|-------|--------|
|                                                                                                | N             | Mean | SD   | N              | Mean | SD   | N               | Mean | SD   |       |        |
| Increasing access to school-based youth SUD prevention/treatment programs                      | 119           | 4.18 | 1.07 | 40             | 4.2  | 1.14 | 79              | 4.18 | 1.05 | 0.11  | 0.91   |
| Increasing access to community-based youth SUD prevention/treatment programs                   | 119           | 4.29 | 1.05 | 39             | 4.36 | 1.16 | 80              | 4.25 | 1.00 | 0.53  | 0.60   |
| Increasing access to family-focused youth SUD treatment/prevention and treatment programs      | 117           | 4.05 | 1.05 | 40             | 4.07 | 1.07 | 77              | 4.04 | 1.04 | 0.18  | 0.86   |
| Improving the implementation evidence-based youth SUD treatment/prevention programs            | 116           | 4.21 | 1.06 | 39             | 4.67 | 0.81 | 77              | 3.97 | 1.10 | 3.48  | <0.001 |
| Increasing access to medications for opioid use disorder among youth                           | 119           | 3.34 | 1.28 | 40             | 3.2  | 1.36 | 79              | 3.42 | 1.24 | -0.88 | 0.38   |
| Coordinating youth SUD services with community-based social services                           | 117           | 4.03 | 1.13 | 40             | 3.75 | 1.10 | 77              | 4.17 | 1.13 | -1.92 | 0.06   |
| De-implementing youth SUD treatment/prevention programs that are not evidence-based            | 116           | 3.22 | 1.25 | 40             | 3.85 | 1.12 | 76              | 2.88 | 1.19 | 4.25  | <0.001 |
| Adverse childhood experiences/childhood trauma                                                 | 116           | 4.3  | 0.91 | 38             | 4.11 | 0.95 | 78              | 4.4  | 0.87 | -1.64 | 0.10   |
| Addressing the social determinants of youth substance use                                      | 116           | 4.25 | 0.95 | 39             | 4.38 | 0.82 | 77              | 4.18 | 1.01 | 1.09  | 0.28   |
| Increasing/aligning the use of quality measures in youth SUD treatment and prevention programs | 116           | 3.96 | 1.11 | 40             | 4.13 | 1.07 | 76              | 3.87 | 1.12 | 1.19  | 0.24   |

|                                                                    |     |      |      |    |      |      |    |      |      |       |      |
|--------------------------------------------------------------------|-----|------|------|----|------|------|----|------|------|-------|------|
| Preventing opioid deaths among youth                               | 117 | 4.07 | 1.18 | 39 | 4.03 | 1.33 | 78 | 4.09 | 1.11 | -0.28 | 0.78 |
| Impact of parental SUD on youth                                    | 120 | 4.11 | 0.95 | 41 | 4.05 | 0.87 | 79 | 4.14 | 1.00 | -0.49 | 0.62 |
| Increasing access to harm reduction education for young people     | 119 | 3.72 | 1.31 | 40 | 3.42 | 1.38 | 79 | 3.87 | 1.27 | -1.77 | 0.08 |
| Increasing access to naloxone for youth in communities and schools | 118 | 3.36 | 1.31 | 40 | 3.37 | 1.37 | 78 | 3.36 | 1.29 | 0.06  | 0.95 |

*SUD= substance use disorder*

**Supplemental Table 2. Means, Factors that Influence Public Substance Use Agency Officials Priorities for Youth Substance Use, State and County Officials, 2019-2020**

|                                           | All<br>N= 122 |      |      | State<br>n= 42 |      |      | County<br>n= 80 |      |      | t     | p    |
|-------------------------------------------|---------------|------|------|----------------|------|------|-----------------|------|------|-------|------|
|                                           | N             | Mean | SD   | N              | Mean | SD   | N               | Mean | SD   |       |      |
| State legislature priorities              | 121           | 3.92 | 1.05 | 41             | 4.15 | 1.04 | 80              | 3.8  | 1.04 | 1.74  | 0.09 |
| Federal government priorities             | 121           | 3.91 | 1.04 | 41             | 4.07 | 1.06 | 80              | 3.83 | 1.03 | 1.24  | 0.22 |
| Governor priorities                       | 121           | 3.77 | 1.07 | 41             | 4.05 | 1.14 | 80              | 3.62 | 1.01 | 2.09  | 0.04 |
| Research evidence                         | 121           | 3.53 | 0.98 | 41             | 3.8  | 1.03 | 80              | 3.39 | 0.93 | 2.25  | 0.03 |
| Budget issues                             | 121           | 4.17 | 0.93 | 41             | 4.1  | 1.04 | 80              | 4.2  | 0.88 | -0.57 | 0.57 |
| State resident demand                     | 121           | 3.39 | 1.03 | 41             | 3.37 | 1.07 | 80              | 3.4  | 1.01 | -0.17 | 0.86 |
| Lawsuits/ concerns about litigation       | 121           | 2.46 | 1.10 | 41             | 2.61 | 1.24 | 80              | 2.39 | 1.03 | 1.05  | 0.30 |
| Consumer advocacy organization priorities | 121           | 2.83 | 0.95 | 41             | 2.76 | 0.97 | 80              | 2.86 | 0.94 | -0.58 | 0.56 |
| Provider advocacy organization priorities | 121           | 3.14 | 1.10 | 41             | 3.02 | 1.11 | 80              | 3.2  | 1.10 | -0.83 | 0.41 |
